# Supplementary material for: Machine-learning assisted optimisation during heterogeneous photocatalytic degradation utilising a static mixer under continuous flow
Source: Royal Society of Chemistry journal article supplement (doi:10.1039/d3re00570d), 2024-01-01
Supplement: d3re00570d1.pdf [file d3re00570d1.pdf]

## Electronic Supplementary Information (ESI)

### Machine-Learning Assisted Optimisation During Heterogeneous Photocatalytic Degradation Utilising a Static Mixer under Continuous Flow

Thomas M. Kohl, Yan Zuo, Benjamin W. Muir, Christian H. Hornung, Anastasios Polyzos, Yutong Zhu, Xingdong Wang and David L. J. Alexander

CSIRO Manufacturing, Bag 10, Clayton South, Victoria 3169, Australia

#### 1. Additional figures and data

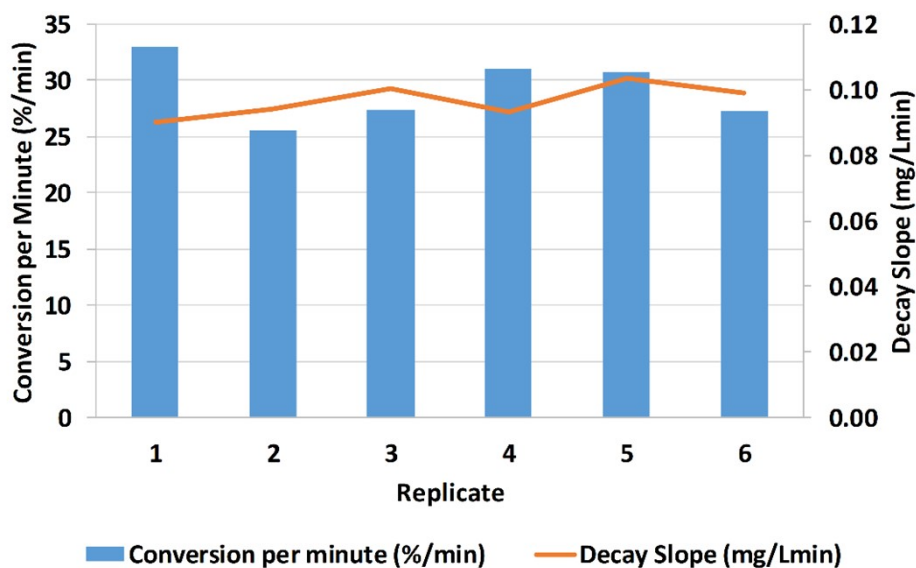

**Figure S1** – Replicate experiments processing 0.7 – 1.0 L of Reactive Orange 16 dye through the continuous photoreactor with catalyst regeneration carried out at the end of each experiment. Conditions: residence time = 3.22 min, temperature = 20 °C and reactor pressure = 10 bar.

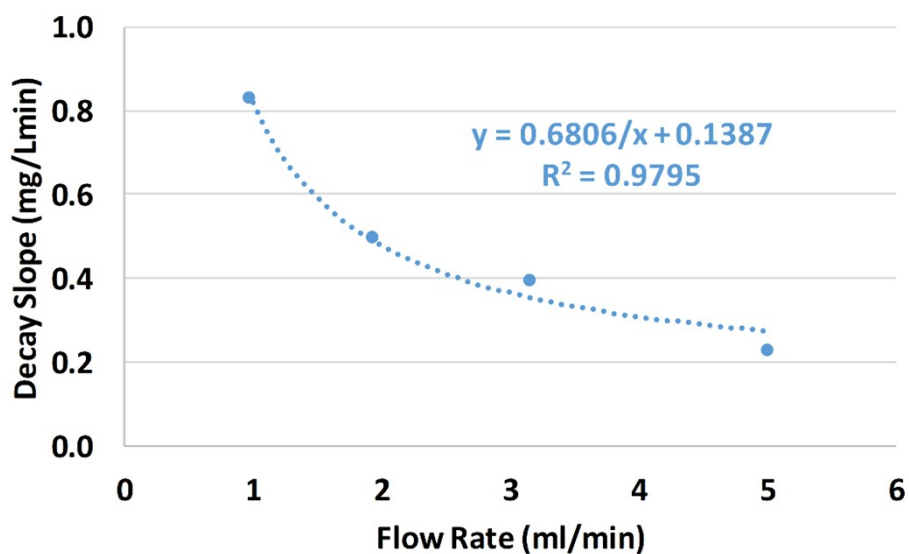

**Figure S2** – Variation in the catalyst activity decay slope observed at different flow rates of Reactive Orange 16. A reciprocal function fitted over the observed flow rate range is shown. Conditions: temperature = 20 °C and reactor pressure = 10 bar.

**Table S1** – Summary of experimental data from the experiments carried out during ML training (light blue. # 1 – 6) and optimisation (# 7 – 17) of the continuous flow photocatalytic degradation of the azo-dye Reactive Orange 16. Dye  $C_1$  is the initial Reactive Orange dye concentration,  $Q_s$  indicates the set flow rate,  $Q_M$  indicates the measured flow rate,  $\tau$  indicates the residence time,  $T_s$  indicates the set temperature,  $T_M$  indicates the measured temperature, catalyst regen indicates if the catalyst was regenerated prior to the experiment or not, X indicates conversion and dye over catalyst is the amount of dye that had passed over the catalyst prior to the start of the reaction (UV lights on, steady state conditions).

| #  | Dye $C_1$<br>(mg/L) | $Q_s$<br>(ml/min) | $Q_M$<br>(ml/min) | $\tau$<br>(min) | $T_s$<br>(°C) | $T_M$<br>(°C) | Catalyst<br>(Regen.) | X<br>(%) | X<br>(%/min) | Dye over<br>catalyst (mg) |
|----|---------------------|-------------------|-------------------|-----------------|---------------|---------------|----------------------|----------|--------------|---------------------------|
| 1  | 84                  | 3.00              | 3.13              | 1.99            | 20            | 19.9          | Yes                  | 77       | 38.6         | 13.2                      |
| 2  | 75                  | 0.98              | 1.00              | 6.24            | 24.4          | 23.0          | Yes                  | 96       | 15.4         | 12.2                      |
| 3  | 75                  | 10.00             | 7.10              | 0.88            | 20.0          | 20.5          | Yes                  | 50       | 56.9         | 0.0                       |
| 4  | 75                  | 3.00              | 3.09              | 2.02            | 20.0          | 19.1          | Yes                  | 80       | 39.6         | 9.0                       |
| 5  | 75                  | 1.00              | 1.02              | 6.12            | 20.0          | 19.8          | No                   | 97       | 15.9         | 23.0                      |
| 6  | 75                  | 3.00              | 3.13              | 1.99            | 80.0          | 68.9          | No                   | 93       | 46.6         | 30.8                      |
| 7  | 74                  | 7.50              | 6.94              | 0.90            | 20.0          | 19.0          | Yes                  | 57       | 63.4         | 10.4                      |
| 8  | 74                  | 7.30              | 7.27              | 0.86            | 38.6          | 35.5          | No                   | 50       | 58.3         | 32.9                      |
| 9  | 74                  | 8.99              | 8.92              | 0.70            | 20.0          | 19.4          | No                   | 29       | 41.5         | 71.7                      |
| 10 | 85                  | 9.01              | 7.92              | 0.79            | 79.9          | 67.5          | Yes                  | 73       | 92.7         | 12.8                      |
| 11 | 85                  | 9.96              | 8.60              | 0.73            | 78.1          | 66.3          | No                   | 63       | 86.8         | 24.4                      |
| 12 | 85                  | 8.05              | 7.43              | 0.84            | 79.5          | 67.5          | No                   | 60       | 71.4         | 38.2                      |
| 13 | 85                  | 9.96              | 9.64              | 0.65            | 57.6          | 49.4          | No                   | 39       | 60.3         | 62.0                      |
| 14 | 81                  | 9.99              | 8.99              | 0.69            | 80.0          | 67.4          | No                   | 62       | 89.3         | 92.6                      |
| 15 | 81                  | 7.47              | 7.59              | 0.82            | 79.9          | 67.3          | Yes                  | 84       | 102.2        | 15.7                      |
| 16 | 81                  | 7.26              | 7.34              | 0.85            | 71.2          | 60.8          | No                   | 74       | 87.0         | 28.2                      |
| 17 | 81                  | 9.98              | 10.00             | 0.62            | 58.3          | 50.5          | No                   | 52       | 83.3         | 39.8                      |
