# Supplementary figures and images for: Machine-learning assisted optimisation during heterogeneous photocatalytic degradation utilising a static mixer under continuous flow
Source: Royal Society of Chemistry journal article supplement (doi:10.1039/d3re00570d), 2024-01-01

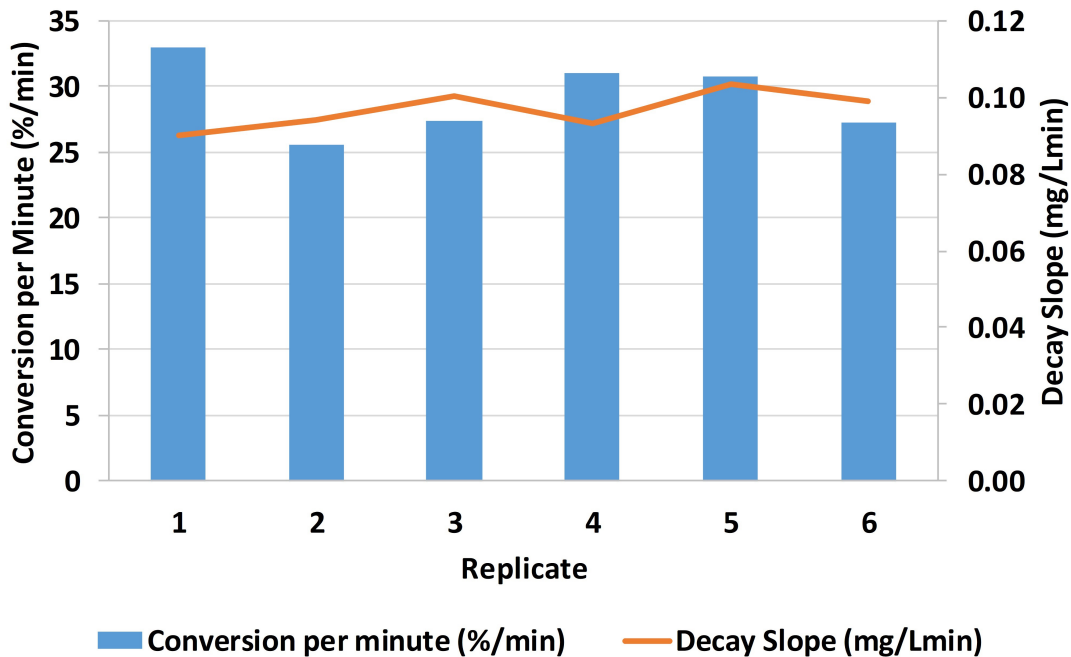

Supplement: d3re00570d3.pdf [file d3re00570d3.pdf]

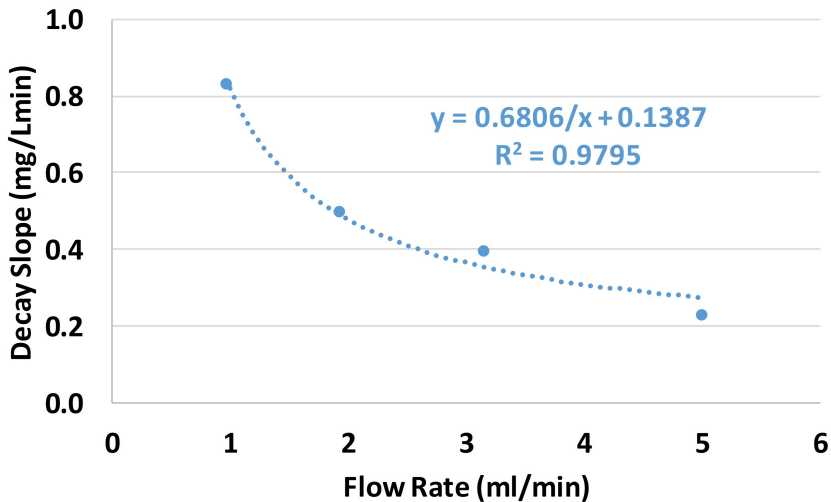

Supplement: d3re00570d4.pdf [file d3re00570d4.pdf]
